# Supplementary material for: An ultrasensitive flexible pressure sensor for multimodal wearable electronic skins based on large-scale polystyrene ball@reduced graphene-oxide core–shell nanoparticles
Source: Royal Society of Chemistry journal article supplement (doi:10.1039/c8tc01153b), 2018-01-01
Supplement: c8tc01153b1.pdf [file c8tc01153b1.pdf]

## Supplementary Information

**Ultrasensitive Flexible Pressure Sensor Toward Multimodal Wearable**

**Electronic Skins Based on Large-Scale Polystyrene Ball@Reduced-Graphene-**

**Oxide Core-Shell Nanoparticles**

Yuanfei Ai,<sup>a,b</sup> Ting Heng Hsu,<sup>b</sup> Ding Chou Wu,<sup>b</sup> Lee Ling<sup>a,b</sup> Jyun-Hong Chen,<sup>b</sup> Yu-Ze Chen,<sup>b</sup>

Shu-Chi Wu,<sup>b</sup> Cuo Wu,<sup>a</sup> Zhiming M. Wang<sup>a\*</sup> and Yu-Lun Chueh<sup>b,c\*</sup>

<sup>a</sup> Institute of Fundamental and Frontier Sciences, University of Electronic Science and Technology of China, Chengdu, P. R. China

<sup>b</sup> Department of Materials Science and Engineering, National Tsing-Hua University, Hsinchu, Taiwan, Republic of China

<sup>c</sup> Frontier Research Center on Fundamental and Applied Sciences of Matters, National Tsing Hua University, Hsinchu 30013, Taiwan, Republic of China

\*Email address: [zhmwang@uestc.edu.cn](mailto:zhmwang@uestc.edu.cn) and [ylchueh@mx.nthu.edu.tw](mailto:ylchueh@mx.nthu.edu.tw)

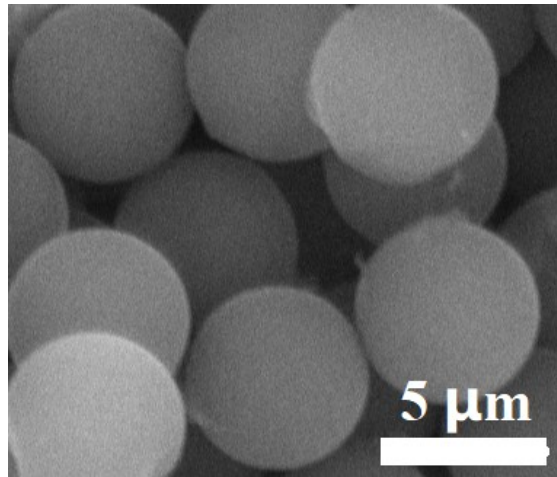

**Figure S1** A SEM image of PS ball

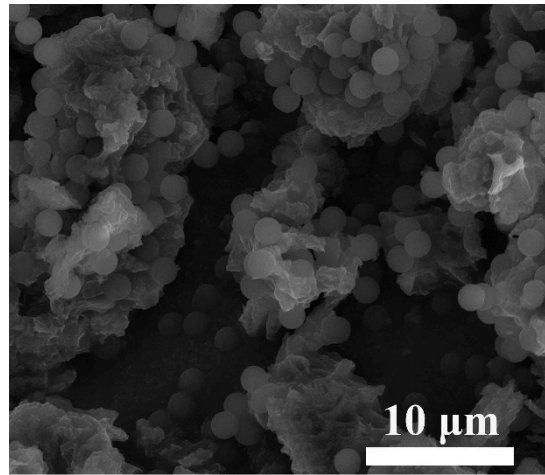

**Figure S2** The best result of the rGO covering on 2 μm diameter PS balls. This small PS ball could not prevent rGO from reuniting.

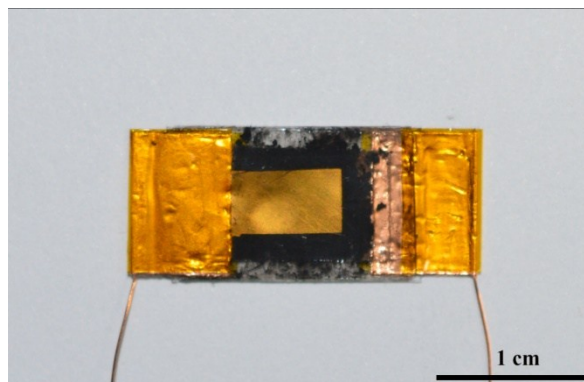

**Figure S3** An optical image of sandwiched structure pressure sensor

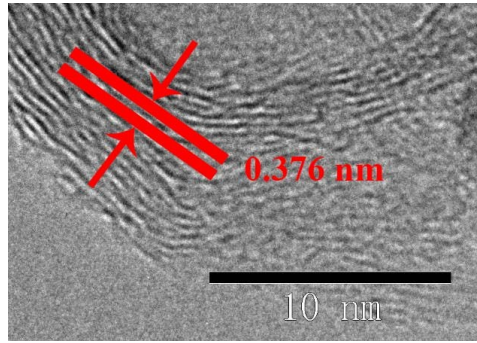

**Figure S4** The high-resolution TEM image of the protruding rGO sheets.

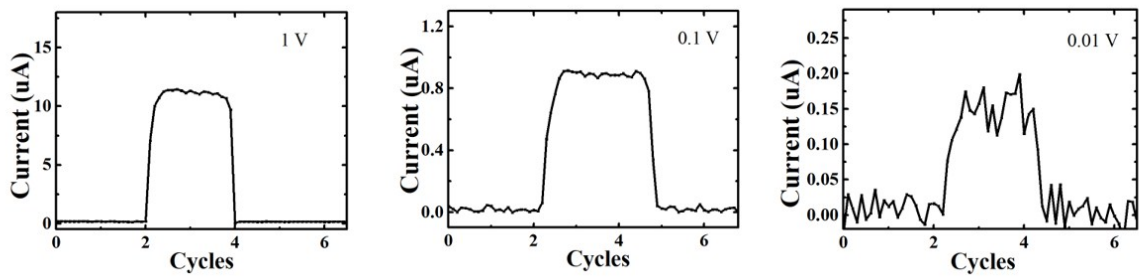

**Figure S5** The current responses under 1, 0.1 and 0.01V voltage when loading a pressure of 2 kPa.

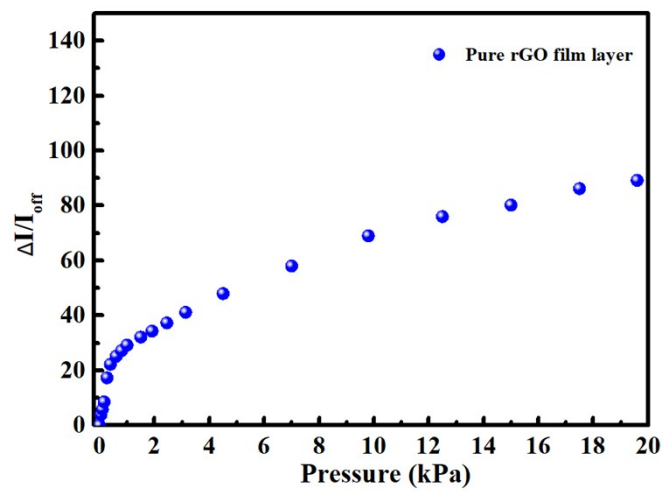

**Figure S6** Current response ( $\Delta I/I_0$ ) vs. applied pressure of the pressure sensor based on the pure rGo film layer.

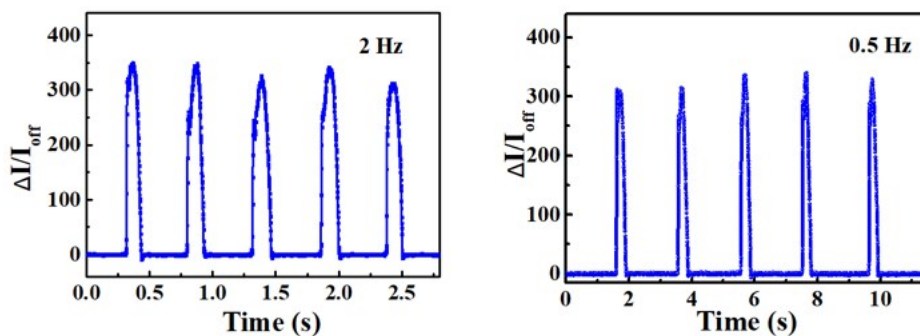

**Figure S7** The response at the frequency of 2 Hz and 0.5 Hz under recurrent 8 kPa pressure.

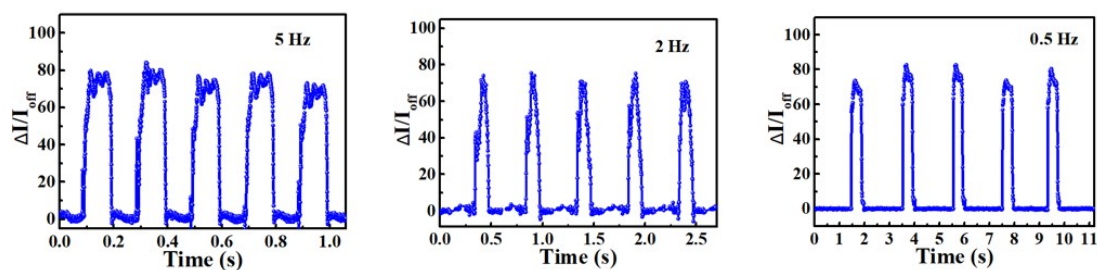

**Figure S8** The responses under recurrent 1 kPa pressure at frequencies of 5, 2 and 0.5 Hz

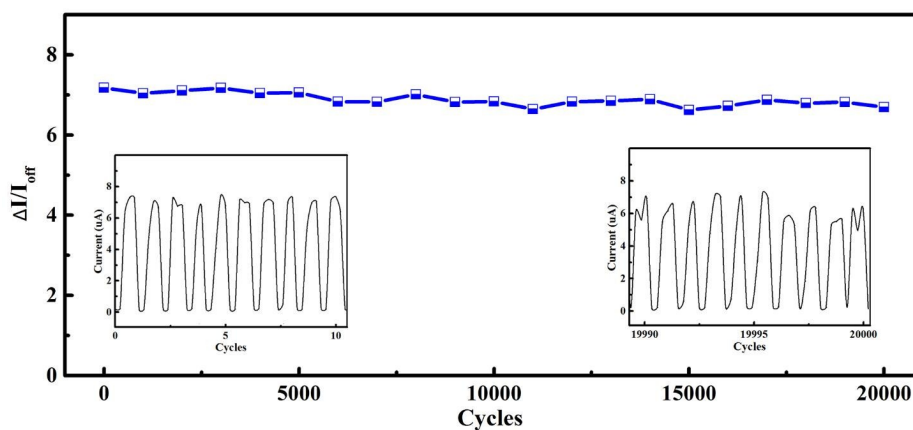

**Figure S9** Retentions Current response ( $\Delta I/I_0$ ) in 20,000 cycles of the PS ball@rGO-based pressure sensor.

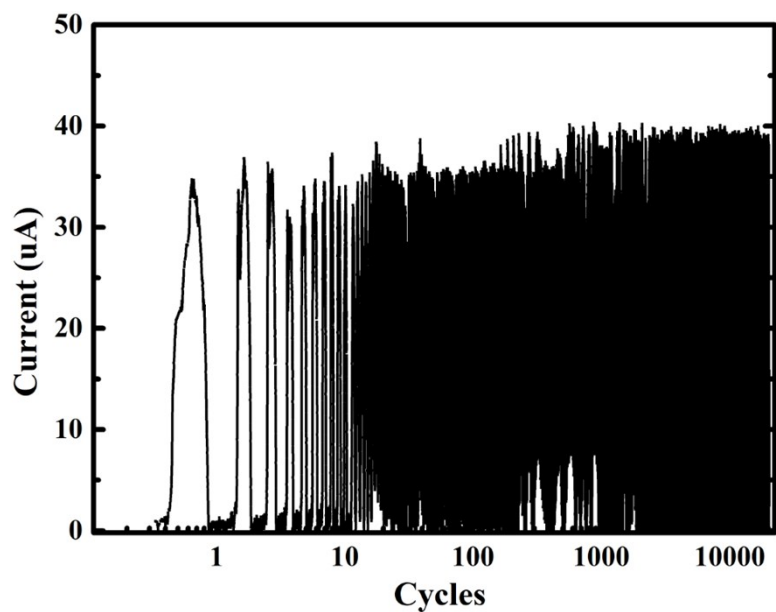

**Figure S10** Current response changes ( $\Delta I/I_{off}$ ) recorded under 20,000 cycles of an applied pressure of 8 kPa.

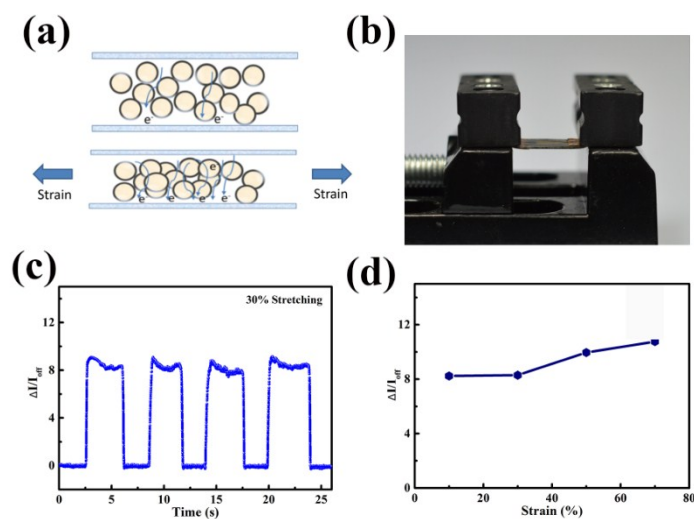

**Figure S11** The stretching performance of the sensor. (a) The schematic diagram of how this resistive pressure sensor response to a horizontal stretch under a bias voltage. (b) The device stretched on the one-dimensional sliding platform. (c) Current response ( $\Delta I/I_{off}$ ) upon 30% stretching. (d) Current response ( $\Delta I/I_{off}$ ) changes from 10 % to 70 % stretching.

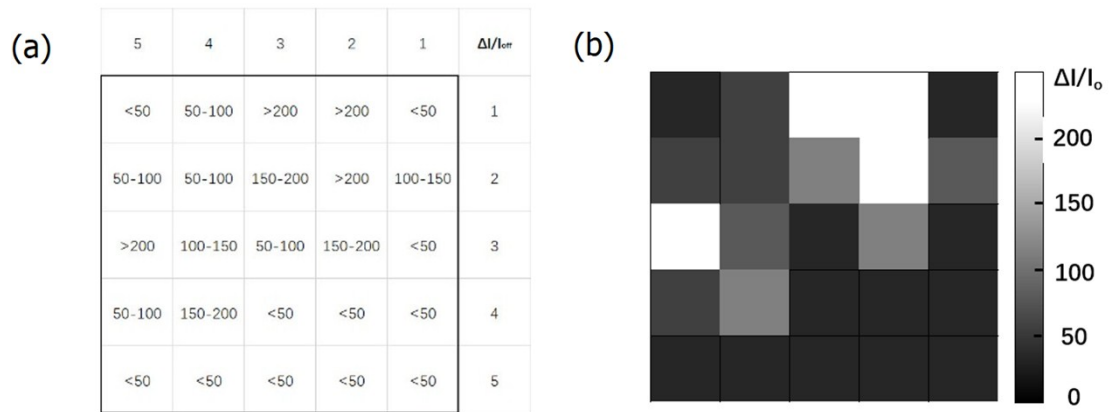

**Figure S12** (a) The response current range value of each point of the  $5 \times 5$  pressure-sensors array. The  $\Delta I/I_{off}$  value of each pressure sensor was classified to 5 levels from 0 to 200. (b) Current mapping of pressure distributions according to the value in (a).
